# Supplementary material for: Switching to external flows: perturbations of developing vasculature within chicken chorioallantoic membrane
Source: Royal Society of Chemistry journal article supplement (doi:10.1039/d4lc00311j), 2024-01-01
Supplement: d4lc00311j1.pdf [file d4lc00311j1.pdf]

## Supplementary Figures

### S1. Egg incubator and engineered eggshell design

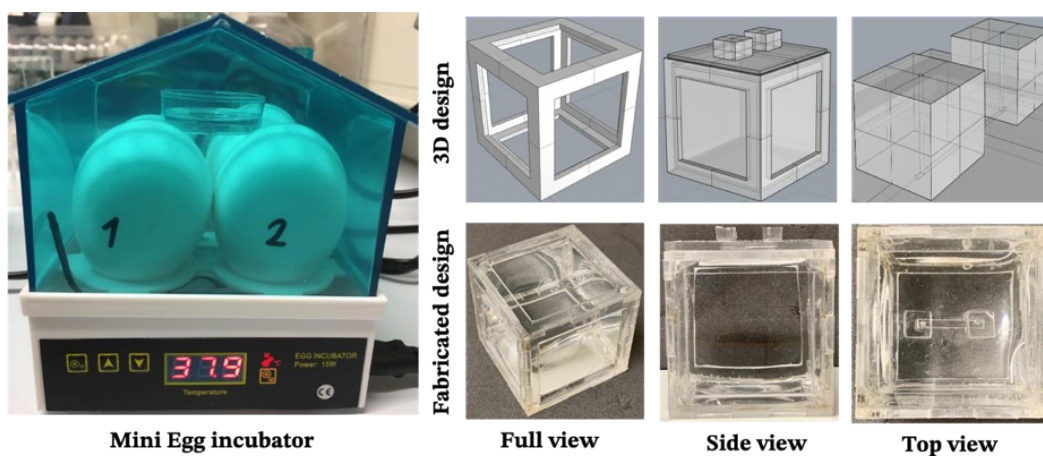

### S2. Fertilized egg showing CAM vasculature cultured within engineered eggshell

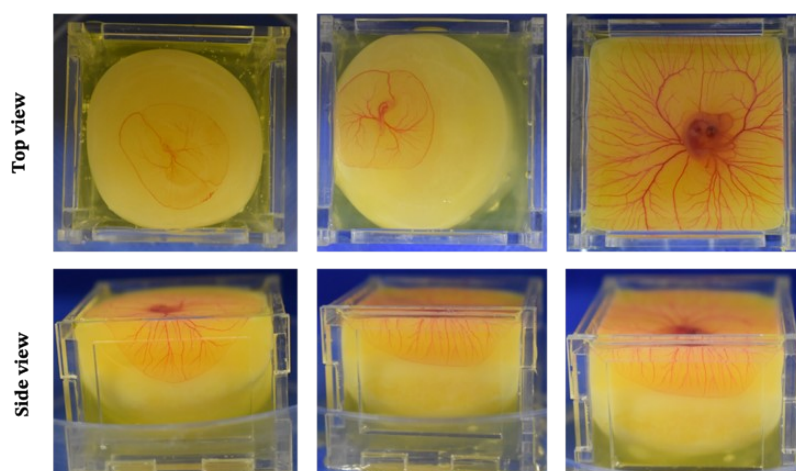

### S3. Proof-of-concept test: Impact of superfusion on porous membrane

#### Superfusion on porous membrane integrated with flow channel

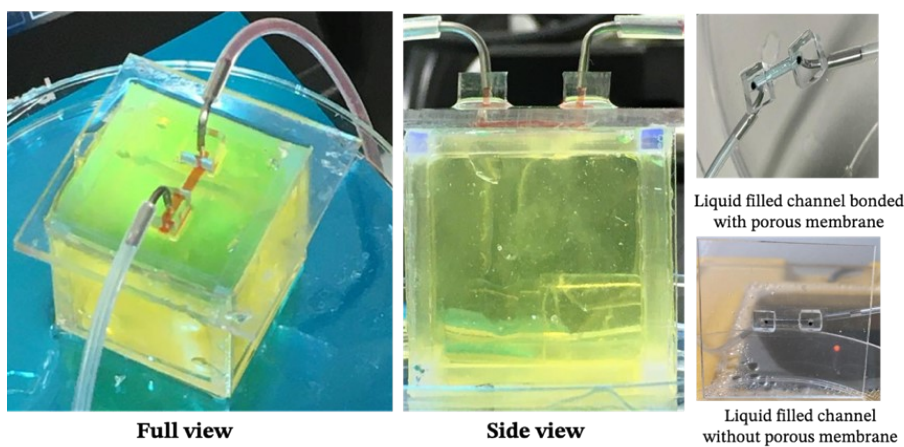

### S4. Statistical test

Statistical significance was analyzed using OriginPro V.9.85 performing Wilcoxon signed Rank Test (non-parametric statistical test) due to limited sample numbers. Differences were considered statistically significant with  $P < 0.05$ . Data shown here are from 3 independent experiment samples, with at least four region of interest (ROIs) per sample.

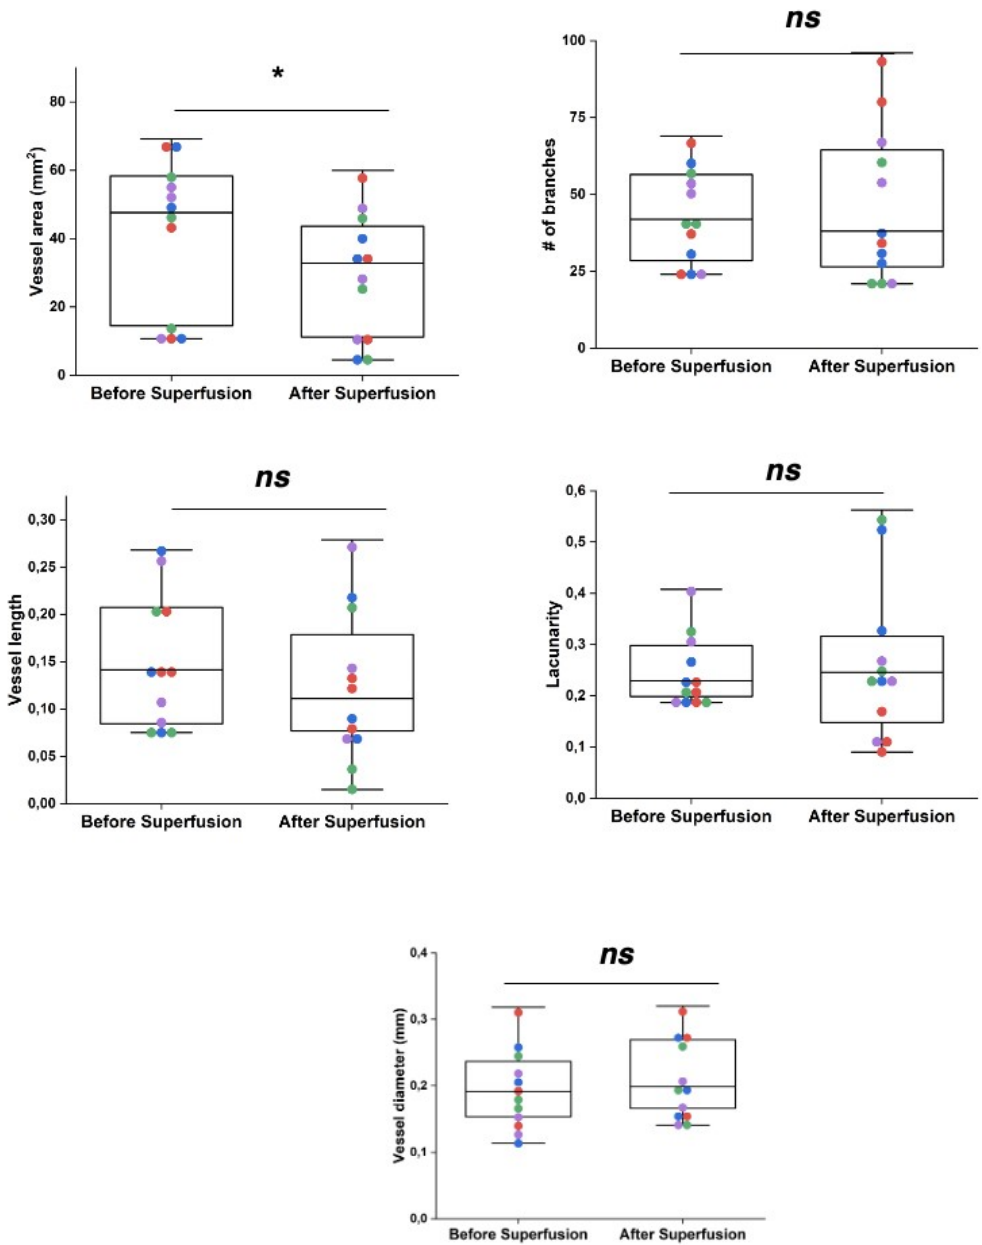

| Morphology parameter | p- value      |               |               |                        |
|----------------------|---------------|---------------|---------------|------------------------|
|                      | S1 (BS vs AS) | S2 (BS vs AS) | S3 (BS vs AS) | All samples (BS vs AS) |
| Vessel area          | 0,20124       | 0,10035       | 0,10035       | 0,00326                |
| Vessel diameter      | 0,58388       | 0,36131       | 0,85513       | 0,50474                |
| Branch number        | 0,36131       | 0,85513       | 0,20124       | 0,84452                |
| Lacunarity           | 0,85513       | 0,85513       | 0,85513       | 0,84452                |
| Vessel length        | 0,58388       | 0,58388       | 0,20124       | 0,06526                |

Supplementary Videos

**Supplementary video 1a:** Red blood cells flowing through multi-sized venous vessels of vascularized CAM tissue.

**Supplementary video 1b:** Red blood cells flowing through multi-sized micro capillaries of vascularized CAM tissue.

**Supplementary video 2a:** Red blood cells flowing through large artery of vascularized CAM tissue.

**Supplementary video 2b:** Red blood cells flowing through artery-veins of vascularized CAM tissue.

**Supplementary video 2c:** Red blood cells flowing through artery, microcapillaries and veins of vascularized CAM.

**Supplementary video 3a:** Chick embryo containing hierarchical vascular networks cultured within engineered eggshell system – chick embryo moving within engineered eggshell system.

**Supplementary video 3b:** Chick embryo containing hierarchical vascular networks cultured within engineered eggshell system – integrated microchannel perfusion on CAM vasculature.

**Supplementary video 4a:** External flow application within microchannel integrated on CAM within engineered eggshell system – introducing external fluids via an integrated microchannel.

**Supplementary video 4b:** External flow application within microchannel integrated on CAM within engineered eggshell system – red blood cells moving within capillaries by external fluid perfusion.

**Supplementary video 5:** Proof-of-concept testing of integrated porous membrane to microfluidic channels within engineered eggshell system.
